# Supplementary material
Source: MDPI journal article supplement (https://www.mdpi.com/2077-0472/12/11/1782)
Supplement: s1 [file s1 › agriculture-1926392-supplementary.pdf]

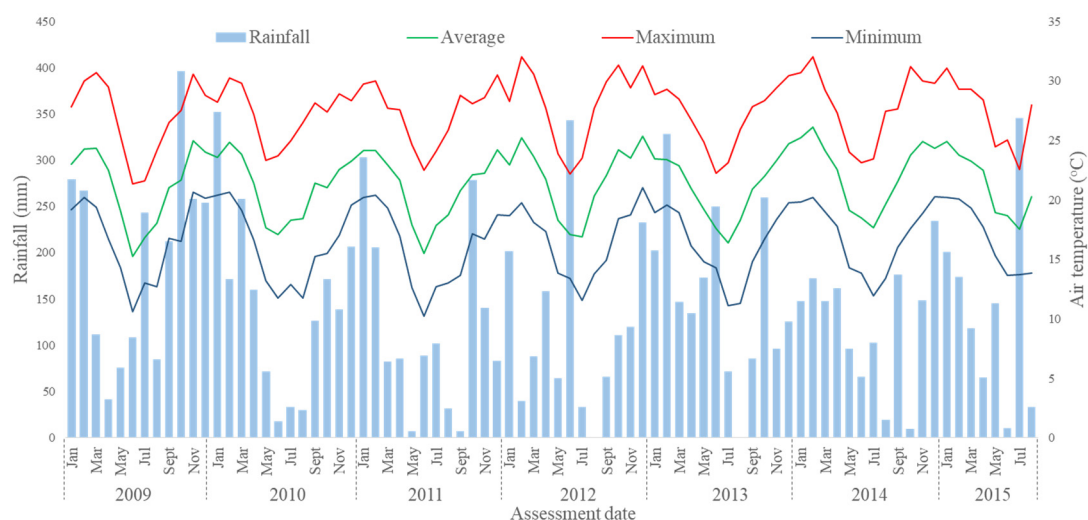

**Figure S1.** Weather conditions (rainfall, average, maximum and minimum air temperature) from the experimental area in Londrina, state of Paraná, Brazil, for the 2009–2015 period. (Source: IDR-Paraná, 2022)

**Table S1.** Soil chemical analysis from the experimental area in Londrina, state of Paraná, Brazil.

| Soil chemical analysis <sup>1</sup>           | Soil depth (cm) |       |       |
|-----------------------------------------------|-----------------|-------|-------|
|                                               | 0–20            | 20–40 | 40–60 |
| pH (CaCl <sub>2</sub> )                       | 4.80            | 4.40  | 4.20  |
| Ca (cmolc·dm <sup>-3</sup> )                  | 3.30            | 1.92  | 1.65  |
| Mg (cmolc·dm <sup>-3</sup> )                  | 2.38            | 1.68  | 1.27  |
| K (cmolc·dm <sup>-3</sup> )                   | 1.05            | 0.30  | 0.16  |
| Al (cmolc·dm <sup>-3</sup> )                  | 0.17            | 0.62  | 0.94  |
| H + Al (cmolc·dm <sup>-3</sup> )              | 6.68            | 7.75  | 8.35  |
| C.E.C. (mmolc·dm <sup>-3</sup> ) <sup>2</sup> | 6.90            | 4.52  | 4.02  |
| V (%)                                         | 50.18           | 33.47 | 26.94 |
| P (mg·dm <sup>-3</sup> )                      | 6.0             | 2.0   | 1.0   |

<sup>1</sup> Soil analysis was conducted in August 2006 (0–60 cm depth). <sup>2</sup> C.E.C.: Cation exchange capacity.
